# Supplementary material
Source: MDPI journal article supplement (https://www.mdpi.com/2624-8549/3/2/47)
Supplement: s1 [file s1]

## Supplementary Material

### Preparation and Antimicrobial Properties of Alginate and Serum Albumin/Glutaraldehyde Hydrogels Impregnated with Silver(I) Ions

Louise Gallagher<sup>1</sup>, Alanna Smith<sup>2</sup>, Kevin Kavanagh<sup>2,3</sup>, Michael Devereux<sup>4</sup>, John Colleran<sup>5,6</sup>, Carmel Breslin<sup>1,3</sup>, Karl G. Richards<sup>7</sup>, Malachy McCann<sup>1</sup>, A. Denise Rooney<sup>1,3\*</sup>

<sup>1</sup> Department of Chemistry Maynooth University, Maynooth, Co. Kildare, Ireland, [carmel.breslin@mu.ie](mailto:carmel.breslin@mu.ie), [denise.rooney@mu.ie](mailto:denise.rooney@mu.ie)

<sup>2</sup> Department of Biology, Maynooth University, Maynooth, Co. Kildare, Ireland. [kevin.kavangh@mu.ie](mailto:kevin.kavangh@mu.ie)

<sup>3</sup> Kathleen Lonsdale Institute for Human Health Research, Maynooth University, Maynooth, Co. Kildare, Ireland.

<sup>4</sup> The Centre for Biomimetic & Therapeutic Research, Focas Research Institute, Technological University Dublin, City Campus, Camden Row, Dublin 8, Ireland.

<sup>5</sup> School of Chemical & Pharmaceutical Sciences, TU Dublin, City Campus, Kevin Street, Dublin 8.

<sup>6</sup> Applied Electrochemistry Group, Focas Research Institute, TU Dublin, Camden Row, Dublin 8.

<sup>7</sup> Environment, Soils and Land-Use Department, Environment Research Centre, Teagasc, Johnstown Castle, Y35TC97 Wexford, Ireland; [Karl.Richards@teagasc.ie](mailto:Karl.Richards@teagasc.ie)

## Optimisation of the electrochemical experimental parameters

Cyclic voltammetry was first performed on a standard  $\text{AgNO}_3$  solution ( $4.5 \times 10^{-4} \text{ M}$ ) to obtain electrochemical profiles for the  $\text{Ag}^+/\text{Ag}^0$  redox couple, in a cell assembly comprising a glassy carbon working electrode, platinum wire auxiliary electrode and a saturated calomel reference electrode in an aqueous  $\text{NaNO}_3$  supporting electrolyte solution (0.2 M) (Fig. A1). The working electrode potential was swept between 0.60 and -0.10 V at a scan rate of  $0.02 \text{ V s}^{-1}$ . Reduction of  $\text{Ag}^+$  to  $\text{Ag}^0$  occurred at  $E_{\text{pc}} = 0.205 \text{ V}$  leading to deposition of  $\text{Ag}^0$  on the electrode surface. The corresponding oxidation stripping process was observed as a well-defined peak at  $E_{\text{pa}} = 0.396 \text{ V}$  (Fig. A2). At potentials more negative than 0.205 V the deposition process is diffusion limited. Thus, a reduction potential from this diffusion limited region, i.e. 0.04 V, was chosen for all subsequent silver deposition experiments involving linear sweep voltammetry (LSV). In order to deposit low concentrations of silver, longer deposition times were employed, while at higher silver concentrations the deposition times required were shorter. Thus,

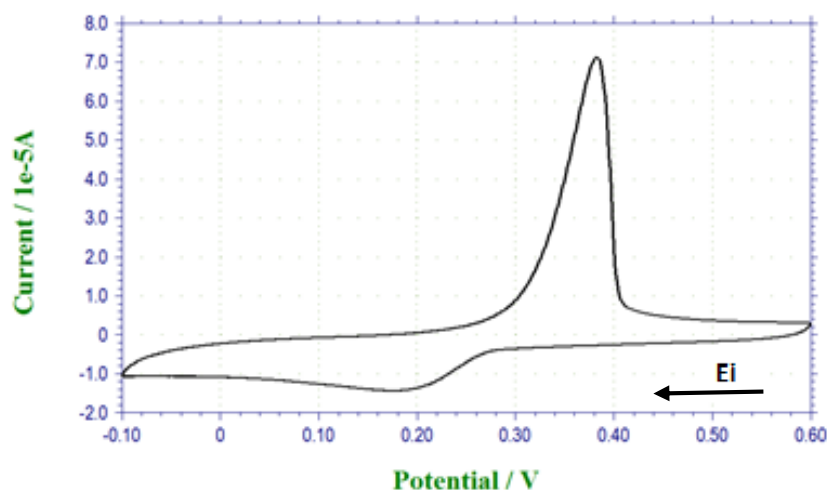

Figure S1: Typical cyclic voltammogram recorded from a solution of  $5 \times 10^{-4} \text{ M}$   $\text{AgNO}_3$  in 0.2 M  $\text{NaNO}_3$  at a glassy carbon electrode. Scan rate,  $100 \text{ mV s}^{-1}$ . Directional arrow indicates the initial applied potential,  $E_i$ .

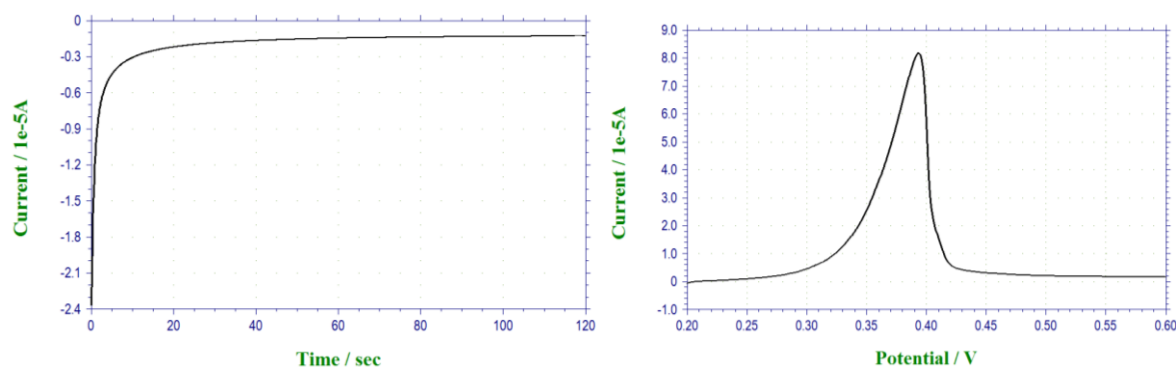

Figure S2: Typical Anodic stripping voltammetry profiles obtained from a solution of  $5 \times 10^{-4} \text{ M}$   $\text{AgNO}_3$  in 0.2 M  $\text{NaNO}_3$  for (left) 120 s deposition time at a constant applied potential of 0.04 V and (right) the corresponding linear sweep voltammetry stripping profile obtained at a scan rate of  $20 \text{ mV s}^{-1}$ .

Stripping peak currents (for generation of calibration curves and leaching experiments) were normalised with respect to the experimental deposition times. Silver metal was stripped from the electrode surface using LSV, swept over the potential range of 0.2 to 1.0 V. A constant potential of 0.9 V was applied for 1 min to ensure that any remaining surface bound silver was re-oxidised from the electrode and returned to the solution. Following each run, the working electrode was removed, washed with deionised water and then polished with 0.05  $\mu\text{m}$  alumina paste before the next measurement was recorded. Using this methodology, stripping peak currents were obtained from  $\text{AgNO}_3$  solutions over the concentration range,  $1 \times 10^{-3}$  to  $1 \times 10^{-6}$  M. Calibration curves correlating stripping peak current to  $\text{Ag}^+$  ion concentration were constructed using a range of  $\text{AgNO}_3$  standard solutions (Fig. A3).

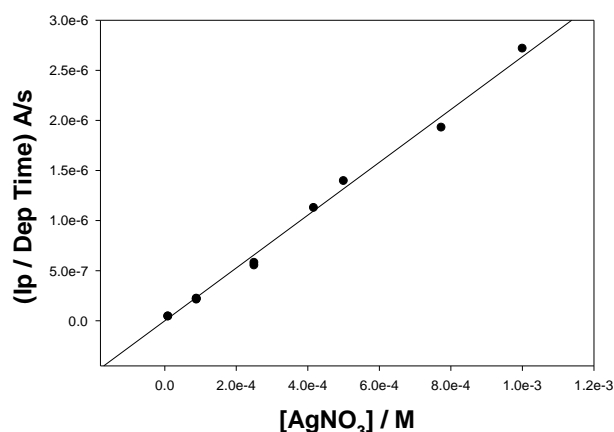

Figure S3: Typical calibration curve obtained from solutions of  $\text{AgNO}_3$  in 0.2 M  $\text{NaNO}_3$ , generated using anodic stripping voltammetry at a glassy carbon electrode. Data from the linear sweep voltammetry peak currents at a scan rate of  $20 \text{ mV s}^{-1}$ , deposition time 60 s and deposition potential 0.04 V. Peak currents were normalised with respect to deposition times. The peak current – deposition time normalisation procedure was validated for a range of deposition times, from 30 s to 900 s.

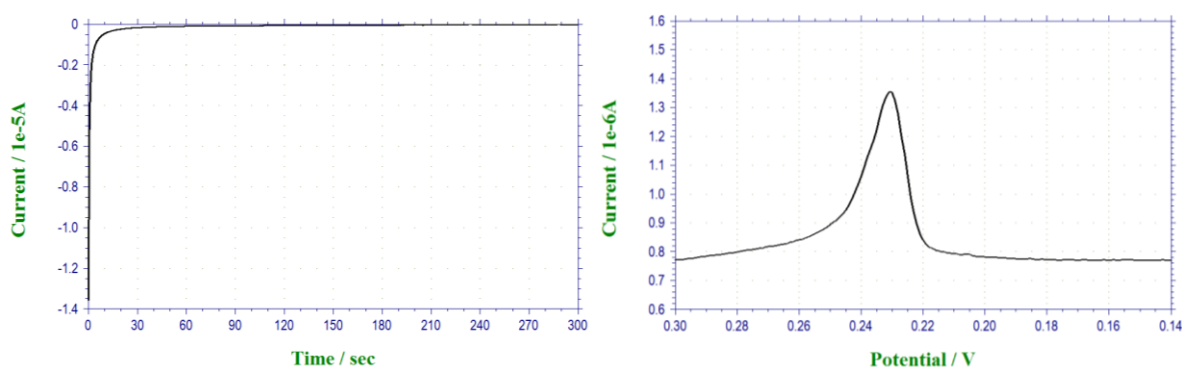

Figure A4: Typical anodic stripping voltammetry profiles to monitor  $\text{Ag}^+$  leaching from BSA/GLA/ $\text{Ag}^+$  hydrogel disks. Constant potential deposition (**right**) of leached silver ions was performed at 0.04 V for 300 s and the subsequent linear sweep voltammetry stripping peak current (**left**), corresponding to  $0.98 \pm 0.04 \mu\text{M Ag}^+$ , was obtained at a scan rate of  $20 \text{ mV s}^{-1}$ .

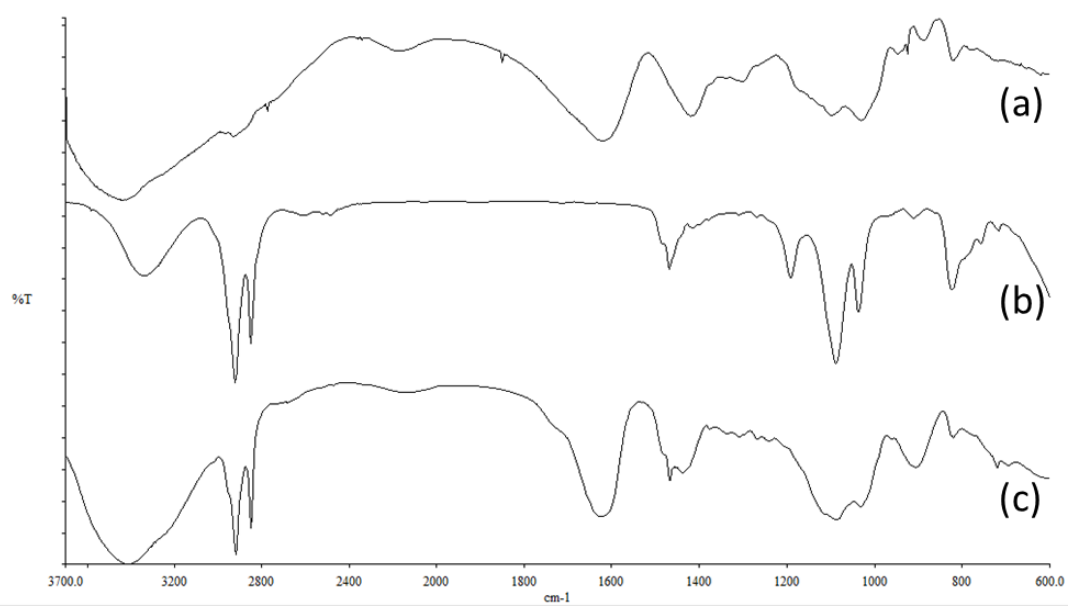

Figure S5. FTIR recorded of (a) sodium alginate (b) (3-(trimethoxysilyl)propyl)-octadecyldimethylammonium chloride c) CaALG/QA

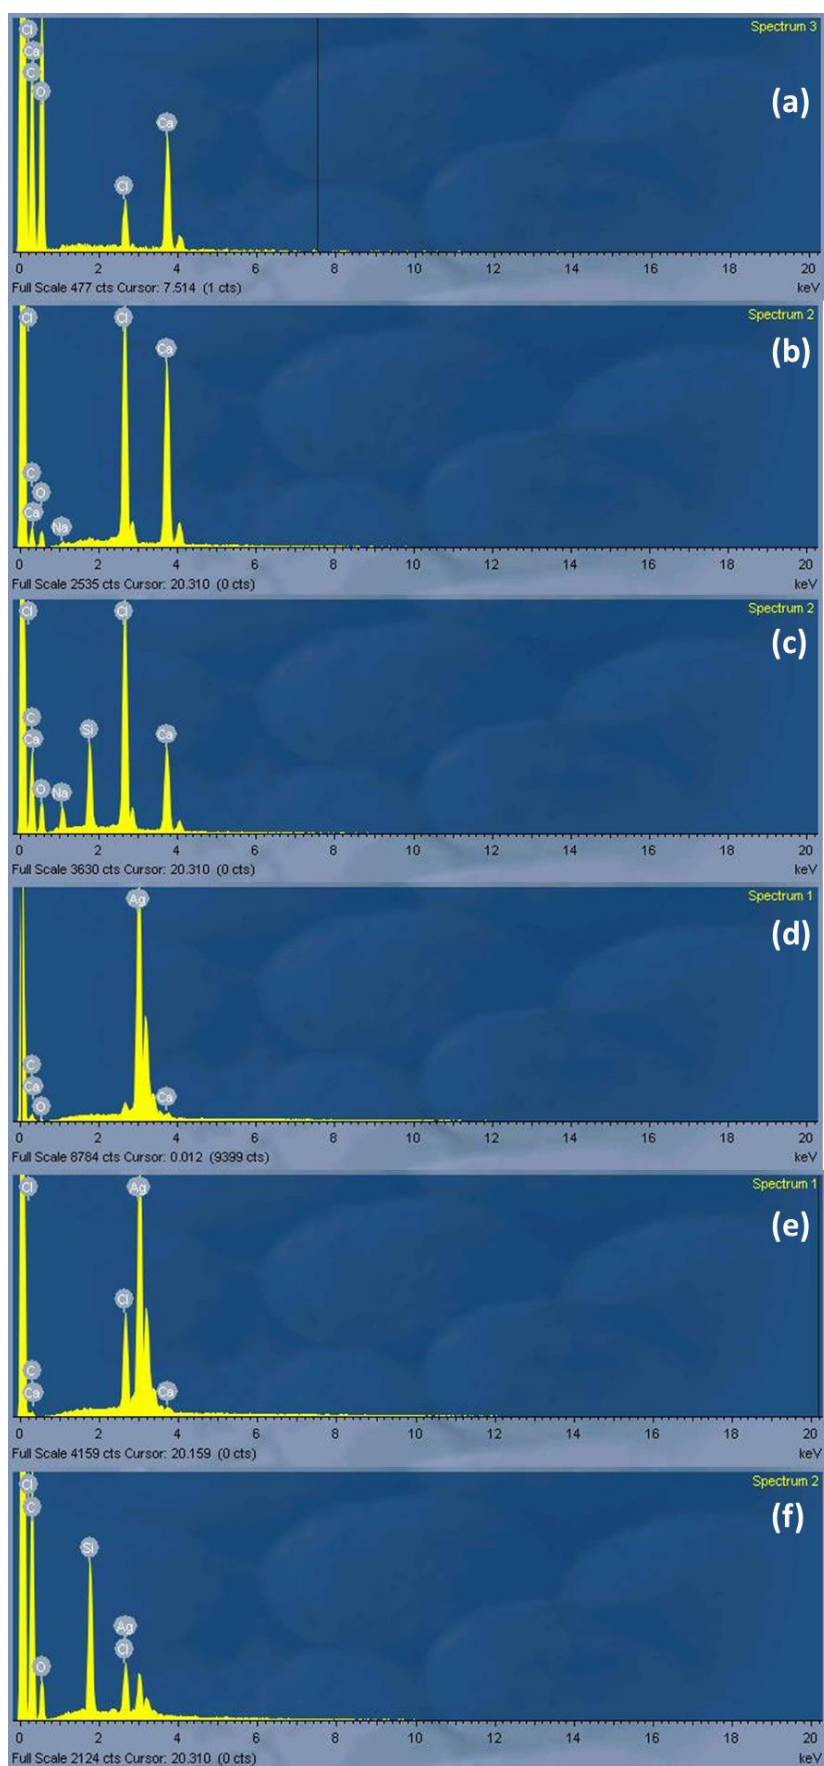

Figure S6: EDX Spectra of the alginate beads (a) CaALG, (b) CaALG/PGA/HSA, (c) CaALG/QA, (d) CaALG/Ag<sup>+</sup>(0.1), (e) CaALG/PGA/HSA/Ag<sup>+</sup>(0.1), (f) CaALG/QA/Ag<sup>+</sup>(0.1)
